# Supplementary material for: Solvent switchable CuII complexes
Source: Royal Society of Chemistry journal article supplement (doi:10.1039/c3nj00722g), 2013-11-22
Supplement: c3nj00722g.pdf [file c3nj00722g.pdf]

## Supplementary Material

### Solvent Switchable Nuclearity of Cu<sup>II</sup> Complexes with 2,6-bis((2-(acetylamino)phenylimino)methyl)-4-*tert*-butylphenol (H<sub>3</sub>L) Ligand

Nataliya E. Borisova,<sup>\*a</sup> Andrey Kostin,<sup>a</sup> Tatiana V. Magdesieva,<sup>a</sup> Marina D. Reshetova,<sup>a</sup> Oleg Nikitin,<sup>a</sup> Verónica Paredes-García,<sup>b,c</sup> M.Teresa Garland,<sup>d</sup> Patricio Hermosilla-Ibáñez,<sup>c,e</sup> Walter Cañon-Mancisidor,<sup>c,f</sup> Alexey Rodionov,<sup>g</sup> Diego Venegas-Yazigi,<sup>c,e</sup> Evgenia Spodine.<sup>\*c,f</sup>

<sup>a</sup> Department of Chemistry, M. V. Lomonosov Moscow State University  
119991 Moscow (Russian Federation). E-mail: borisova.nataliya@gmail.com.

<sup>b</sup> Universidad Andres Bello, Departamento de Química, Santiago, Chile.

<sup>c</sup> CEDENNA, Santiago, Chile.

<sup>d</sup> Facultad de Ciencias Físicas y Matemáticas, U. de Chile, Santiago, Chile.

<sup>e</sup> Facultad de Química y Biología, U. de Santiago de Chile (USACH), Santiago, Chile.

<sup>f</sup> Facultad de Ciencias Químicas y Farmacéuticas, Universidad de Chile, Santiago, Chile. E-mail: espodine@ciq.uchile.cl

<sup>g</sup> A.N. Nesmeyanov Institute of Organoelement Compounds, Moscow, Russia.

### New Journal of Chemistry

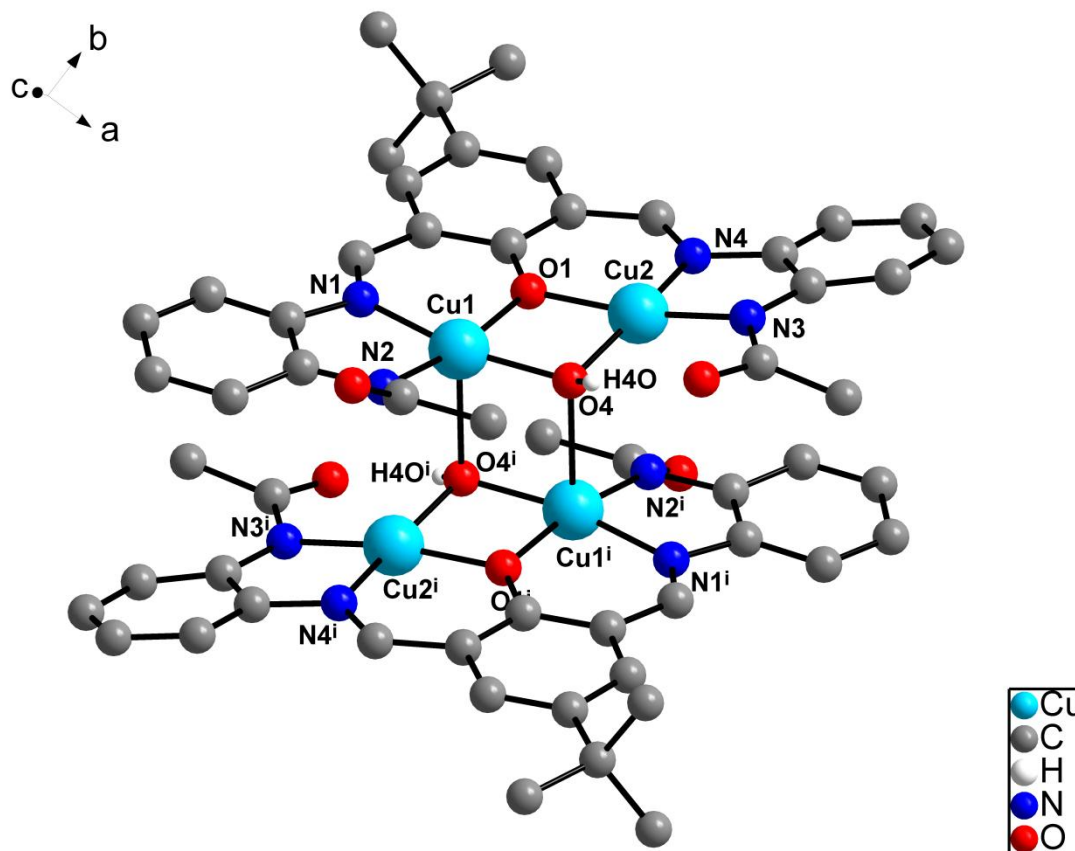

**Figure S1.** Scheme of the tetranuclear complex [Cu<sub>2</sub>L(OH)]<sub>2</sub>. Hydrogen atoms, methanol and water molecule have been omitted for the sake of clarity.

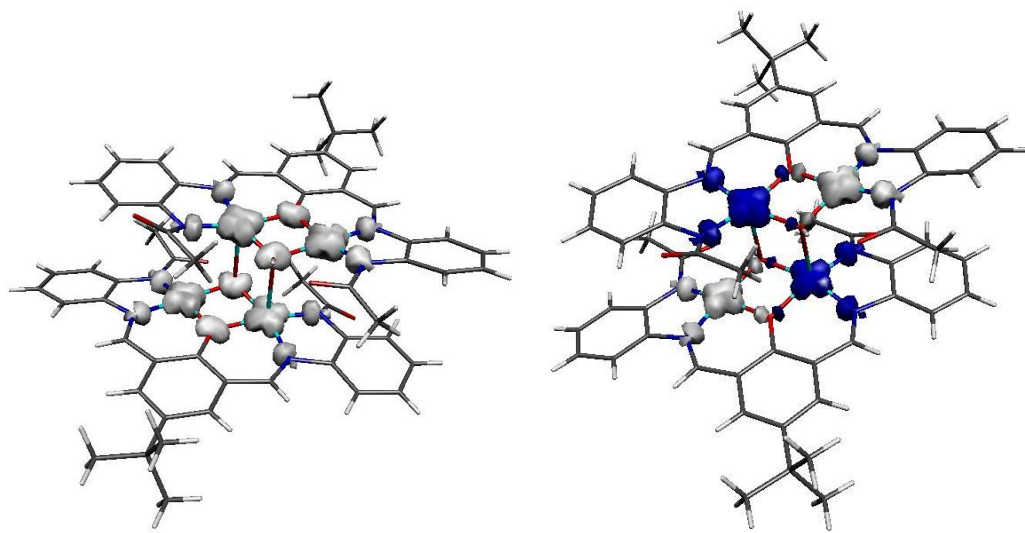

**Figure S2.** Spin density surfaces for the different spin solutions. Gray: alpha spin density; Blue: beta spin density.

**Table S1. Bond distances (Å) for [Cu<sub>2</sub>L(OH)]<sub>2</sub>·2CH<sub>3</sub>OH·H<sub>2</sub>O (1)**

|     |                 |           |     |     |          |
|-----|-----------------|-----------|-----|-----|----------|
| Cu1 | Cu2             | 3.0389(9) | C13 | C14 | 1.384(7) |
| Cu1 | N1              | 1.954(4)  | C13 | C21 | 1.402(7) |
| Cu1 | N2              | 1.972(4)  | C14 | C15 | 1.374(8) |
| Cu1 | O1              | 2.017(3)  | C15 | C16 | 1.367(8) |
| Cu1 | O4              | 1.925(3)  | C16 | C24 | 1.419(7) |
| Cu1 | O4 <sup>i</sup> | 2.425(3)  | C17 | C18 | 1.377(7) |
| Cu2 | N3              | 1.960(4)  | C17 | C20 | 1.383(7) |
| Cu2 | N4              | 1.916(4)  | C18 | C19 | 1.367(7) |
| Cu2 | O1              | 1.946(3)  | C19 | C23 | 1.399(7) |
| Cu2 | O4              | 1.899(3)  | C20 | C22 | 1.398(7) |
| C1  | C2              | 1.403(6)  | C21 | C24 | 1.394(7) |
| C1  | C6              | 1.423(6)  | C21 | N1  | 1.435(6) |
| C1  | O1              | 1.322(5)  | C22 | C23 | 1.406(7) |
| C2  | C3              | 1.413(6)  | C22 | N4  | 1.421(6) |
| C2  | C11             | 1.445(6)  | C23 | N3  | 1.408(6) |
| C3  | C4              | 1.385(6)  | C24 | N2  | 1.412(6) |
| C4  | C5              | 1.388(7)  | C25 | C27 | 1.519(7) |
| C4  | C7              | 1.531(6)  | C26 | C28 | 1.512(7) |
| C5  | C6              | 1.399(7)  | C27 | N3  | 1.347(6) |
| C6  | C12             | 1.442(7)  | C27 | O2  | 1.246(6) |
| C7  | C8              | 1.520(7)  | C28 | N2  | 1.380(7) |
| C7  | C9              | 1.546(7)  | C28 | O3  | 1.236(6) |
| C7  | C10             | 1.520(7)  |     |     |          |
| C11 | N4              | 1.291(6)  |     |     |          |
| C12 | N1              | 1.292(6)  |     |     |          |

Symmetry code: (i) 1/2-x, 3/2-y, 1-z

**Table S2. Selected bond angles (°) for [Cu<sub>2</sub>L(OH)]<sub>2</sub>·2CH<sub>3</sub>OH·H<sub>2</sub>O (1)**

|                         |            |                         |            |
|-------------------------|------------|-------------------------|------------|
| N1 Cu1 Cu2              | 127.57(12) | Cu1 O1 Cu2              | 100.12(13) |
| N1 Cu1 N2               | 85.21(16)  | Cu1 O4 Cu1 <sup>i</sup> | 97.54(14)  |
| N1 Cu1 O1               | 89.12(14)  | Cu2 O4 Cu1 <sup>i</sup> | 100.95(14) |
| N1 Cu1 O4 <sup>i</sup>  | 99.57(14)  | Cu1 O4 Cu2              | 105.23(15) |
| N2 Cu1 Cu2              | 144.29(12) |                         |            |
| N2 Cu1 O1               | 170.23(14) |                         |            |
| N2 Cu1 O4 <sup>i</sup>  | 96.14(14)  |                         |            |
| O1 Cu1 Cu2              | 39.09(8)   |                         |            |
| O1 Cu1 O4 <sup>i</sup>  | 92.64(12)  |                         |            |
| O4 <sup>i</sup> Cu1 Cu2 | 92.03(8)   |                         |            |
| O4 Cu1 Cu2              | 37.08(10)  |                         |            |
| O4 Cu1 N1               | 164.61(15) |                         |            |
| O4 Cu1 N2               | 109.84(15) |                         |            |
| O4 Cu1 O1               | 75.53(13)  |                         |            |
| O4 Cu1 O4 <sup>i</sup>  | 82.46(14)  |                         |            |
| N3 Cu2 Cu1              | 139.50(12) |                         |            |
| N4 Cu2 Cu1              | 134.30(11) |                         |            |
| N4 Cu2 N3               | 85.42(16)  |                         |            |
| N4 Cu2 O1               | 93.51(14)  |                         |            |
| O1 Cu2 Cu1              | 40.80(9)   |                         |            |
| O1 Cu2 N3               | 170.48(15) |                         |            |
| O4 Cu2 Cu1              | 37.69(10)  |                         |            |
| O4 Cu2 N3               | 104.61(15) |                         |            |
| O4 Cu2 N4               | 167.56(16) |                         |            |
| O4 Cu2 O1               | 77.82(14)  |                         |            |

Symmetry code: (i) 1/2-x, 3/2-y, 1-z
